# Supplementary material for: The testis protein ZNF165 is a SMAD3 cofactor that coordinates oncogenic TGFβ signaling in triple-negative breast cancer
Source: eLife. 2020 Jun 9;9:e57679. doi: 10.7554/eLife.57679 (PMC7302877; doi:10.7554/eLife.57679)
Supplement: Supplementary file 3. [file elife-57679-supp3.xls]

## Sheet: HuRI_ZNF165_interactors
Gene Name	Ensembl ID	Uniprot ID	Entrez ID	Protein Description
AC008543.1	ENSG00000197332			null
AHCYL1	ENSG00000168710	O43865	10768	Multifaceted cellular regulator which coordinates several essential cellular functions including regulation of epithelial HCO3(-) and fluid secretion, mRNA processing and DNA replication. Regulates ITPR1 sensitivity to inositol 1,4,5-trisphosphate competing for the common binding site and acting as endogenous 'pseudoligand' whose inhibitory activity can be modulated by its phosphorylation status.…
CARD10	ENSG00000100065	Q9BWT7	29775	Activates NF-kappa-B via BCL10 and IKK.
CCDC125	ENSG00000183323	Q86Z20	202243	May be involved in the regulation of cell migration.
CCDC130	ENSG00000104957	P13994	81576	null
CCDC85B	ENSG00000175602	Q15834	11007	Functions as a transcriptional repressor (PubMed:17014843). May inhibit the activity of CTNNB1 in a TP53-dependent manner and thus regulate cell growth (PubMed:17873903). May function in adipocyte differentiation, negatively regulating mitotic clonal expansion (By similarity).
CEP70	ENSG00000114107	Q8NHQ1	80321	Plays a role in the organization of both preexisting and nascent microtubules in interphase cells. During mitosis, required for the organization and orientation of the mitotic spindle.
CYSRT1	ENSG00000197191	A8MQ03	375791	null
DVL2	ENSG00000004975	O14641	1856	Plays a role in the signal transduction pathways mediated by multiple Wnt genes. Participates both in canonical and non-canonical Wnt signaling by binding to the cytoplasmic C-terminus of frizzled family members and transducing the Wnt signal to down-stream effectors. Promotes internalization and degradation of frizzled proteins upon Wnt signaling.
DVL3	ENSG00000161202	Q92997	1857	Involved in the signal transduction pathway mediated by multiple Wnt genes.
ELOA2	ENSG00000206181	Q8IYF1	51224	SIII, also known as elongin, is a general transcription elongation factor that increases the RNA polymerase II transcription elongation past template-encoded arresting sites. Subunit A2 is transcriptionally active but its transcription activity is not enhanced by binding to the dimeric complex of the SIII regulatory subunits B and C (elongin BC complex).
EMD	ENSG00000102119	P50402	2010	Stabilizes and promotes the formation of a nuclear actin cortical network. Stimulates actin polymerization in vitro by binding and stabilizing the pointed end of growing filaments. Inhibits beta-catenin activity by preventing its accumulation in the nucleus. Acts by influencing the nuclear accumulation of beta-catenin through a CRM1-dependent export pathway. Links centrosomes to the nuclear envel…
EWSR1	ENSG00000182944	Q01844	2130	Might normally function as a transcriptional repressor. EWS-fusion-proteins (EFPS) may play a role in the tumorigenic process. They may disturb gene expression by mimicking, or interfering with the normal function of CTD-POLII within the transcription initiation complex. They may also contribute to an aberrant activation of the fusion protein target genes.
FAM124A	ENSG00000150510	Q86V42	220108	null
GOLGA6L9	ENSG00000197978	A6NEM1	440295	null
GPATCH2L	ENSG00000089916	Q9NWQ4	55668	null
HOMEZ	ENSG00000215271	Q8IX15	57594	May function as a transcriptional regulator.
IL16	ENSG00000172349	Q14005	3603	Interleukin-16 stimulates a migratory response in CD4+ lymphocytes, monocytes, and eosinophils. Primes CD4+ T-cells for IL-2 and IL-15 responsiveness. Also induces T-lymphocyte expression of interleukin 2 receptor. Ligand for CD4.
KAT7	ENSG00000136504	O95251	11143	Component of the HBO1 complex which has a histone H4-specific acetyltransferase activity, a reduced activity toward histone H3 and is responsible for the bulk of histone H4 acetylation in vivo. Involved in H3K14 (histone H3 lysine 14) acetylation and cell proliferation (By similarity). Through chromatin acetylation it may regulate DNA replication and act as a coactivator of TP53-dependent transcr…
KRT40	ENSG00000204889	Q6A162	125115	May play a role in late hair differentiation.
KRTAP10-7	ENSG00000272804	P60409	386675	In the hair cortex, hair keratin intermediate filaments are embedded in an interfilamentous matrix, consisting of hair keratin-associated proteins (KRTAP), which are essential for the formation of a rigid and resistant hair shaft through their extensive disulfide bond cross-linking with abundant cysteine residues of hair keratins. The matrix proteins include the high-sulfur and high-glycine-tyros…
KRTAP10-8	ENSG00000187766	P60410	386681	In the hair cortex, hair keratin intermediate filaments are embedded in an interfilamentous matrix, consisting of hair keratin-associated proteins (KRTAP), which are essential for the formation of a rigid and resistant hair shaft through their extensive disulfide bond cross-linking with abundant cysteine residues of hair keratins. The matrix proteins include the high-sulfur and high-glycine-tyros…
KRTAP10-9	ENSG00000221837	P60411	386676	In the hair cortex, hair keratin intermediate filaments are embedded in an interfilamentous matrix, consisting of hair keratin-associated proteins (KRTAP), which are essential for the formation of a rigid and resistant hair shaft through their extensive disulfide bond cross-linking with abundant cysteine residues of hair keratins. The matrix proteins include the high-sulfur and high-glycine-tyros…
KRTAP2-3	ENSG00000212724	P0C7H8	730755	In the hair cortex, hair keratin intermediate filaments are embedded in an interfilamentous matrix, consisting of hair keratin-associated proteins (KRTAP), which are essential for the formation of a rigid and resistant hair shaft through their extensive disulfide bond cross-linking with abundant cysteine residues of hair keratins. The matrix proteins include the high-sulfur and high-glycine-tyros…
KRTAP2-4	ENSG00000213417	Q9BYR9	730755	In the hair cortex, hair keratin intermediate filaments are embedded in an interfilamentous matrix, consisting of hair keratin-associated proteins (KRTAP), which are essential for the formation of a rigid and resistant hair shaft through their extensive disulfide bond cross-linking with abundant cysteine residues of hair keratins. The matrix proteins include the high-sulfur and high-glycine-tyros…
KRTAP4-12	ENSG00000213416	Q9BQ66	83755	In the hair cortex, hair keratin intermediate filaments are embedded in an interfilamentous matrix, consisting of hair keratin-associated proteins (KRTAP), which are essential for the formation of a rigid and resistant hair shaft through their extensive disulfide bond cross-linking with abundant cysteine residues of hair keratins. The matrix proteins include the high-sulfur and high-glycine-tyros…
MAB21L3	ENSG00000173212	Q8N8X9	126868	null
MID2	ENSG00000080561	Q9UJV3	11043	May play a role in microtubule stabilization.
PDLIM7	ENSG00000196923	Q9NR12	9260	May function as a scaffold on which the coordinated assembly of proteins can occur. May play a role as an adapter that, via its PDZ domain, localizes LIM-binding proteins to actin filaments of both skeletal muscle and nonmuscle tissues. Involved in both of the two fundamental mechanisms of bone formation, direct bone formation (e.g. embryonic flat bones mandible and cranium), and endochondral bon…
PICK1	ENSG00000100151	Q9NRD5	9463	Probable adapter protein that bind to and organize the subcellular localization of a variety of membrane proteins containing some PDZ recognition sequence. Involved in the clustering of various receptors, possibly by acting at the receptor internalization level. Plays a role in synaptic plasticity by regulating the trafficking and internalization of AMPA receptors. May be regulated upon PRKCA act…
PLEKHF2	ENSG00000175895	Q9H8W4	79666	May play a role in early endosome fusion upstream of RAB5, hence regulating receptor trafficking and fluid-phase transport. Enhances cellular sensitivity to TNF-induced apoptosis (PubMed:18288467).
PPL	ENSG00000118898	O60437	5493	Component of the cornified envelope of keratinocytes. May link the cornified envelope to desmosomes and intermediate filaments. May act as a localization signal in PKB/AKT-mediated signaling.
RNPS1	ENSG00000205937	Q15287	10921	Part of pre- and post-splicing multiprotein mRNP complexes. Auxiliary component of the splicing-dependent multiprotein exon junction complex (EJC) deposited at splice junction on mRNAs. The EJC is a dynamic structure consisting of core proteins and several peripheral nuclear and cytoplasmic associated factors that join the complex only transiently either during EJC assembly or during subsequent m…
SCAND1	ENSG00000171222	P57086	51282	May regulate transcriptional activity.
SUMO1P1	ENSG00000241721			null
TRIM41	ENSG00000146063	Q8WV44	90933	Functions as an E3 ligase that catalyzes the ubiquitin-mediated degradation of protein kinase C.
UBE2I	ENSG00000103275	P63279	7329	Accepts the ubiquitin-like proteins SUMO1, SUMO2, SUMO3 and SUMO4 from the UBLE1A-UBLE1B E1 complex and catalyzes their covalent attachment to other proteins with the help of an E3 ligase such as RANBP2, CBX4 and ZNF451. Can catalyze the formation of poly-SUMO chains. Necessary for sumoylation of FOXL2 and KAT5. Essential for nuclear architecture and chromosome segregation. Sumoylates p53/TP53 at…
WDYHV1	ENSG00000156795	Q96HA8	55093	Mediates the side-chain deamidation of N-terminal glutamine residues to glutamate, an important step in N-end rule pathway of protein degradation. Conversion of the resulting N-terminal glutamine to glutamate renders the protein susceptible to arginylation, polyubiquitination and degradation as specified by the N-end rule. Does not act on substrates with internal or C-terminal glutamine and does …
ZNF24	ENSG00000172466	P17028	7572	Transcription factor required for myelination of differentiated oligodendrocytes. Required for the conversion of oligodendrocytes from the premyelinating to the myelinating state. In the developing central nervous system (CNS), involved in the maintenance in the progenitor stage by promoting the cell cycle. Specifically binds to the 5'-TCAT-3' DNA sequence (By similarity). Has transcription repre…
ZNF250	ENSG00000196150	P15622	58500	May be involved in transcriptional regulation.
ZNF263	ENSG00000006194	O14978	10127	Might play an important role in basic cellular processes as a transcriptional repressor.
ZNF417	ENSG00000173480	Q8TAU3	147687	May be involved in transcriptional regulation.
ZNF446	ENSG00000083838	Q9NWS9	55663	May be involved in transcriptional regulation.
ZNF572	ENSG00000180938	Q7Z3I7	137209	May be involved in transcriptional regulation.
ZNF668	ENSG00000167394	Q96K58	79759	May be involved in transcriptional regulation.
ZNF774	ENSG00000196391	Q6NX45	342132	May be involved in transcriptional regulation.
ZNF837	ENSG00000152475	Q96EG3	116412	May be involved in transcriptional regulation.
ZSCAN22	ENSG00000182318	P10073	342945	May be involved in transcriptional regulation.
##
## Date Downloaded: Jun 13 2019
## Database Version: 3
##
## Query Parameters
## Score Filter: 0
## Interaction Catagories Included: Published
## Tissue Filter: None

## Sheet: HuRI_ZNF446_interactors
Gene Name	Ensembl ID	Uniprot ID	Entrez ID	Protein Description
AL513477.1	ENSG00000269896		100129534	null
ANKRD1	ENSG00000148677	Q15327	27063	May play an important role in endothelial cell activation. May act as a nuclear transcription factor that negatively regulates the expression of cardiac genes. Induction seems to be correlated with apoptotic cell death in hepatoma cells.
CCNK	ENSG00000090061	O75909	8812	Regulatory subunit of cyclin-dependent kinases that mediates activation of target kinases. Plays a role in transcriptional regulation via its role in regulating the phosphorylation of the C-terminal domain (CTD) of the large subunit of RNA polymerase II (POLR2A).
COPS2	ENSG00000166200	P61201	9318	Essential component of the COP9 signalosome complex (CSN), a complex involved in various cellular and developmental processes. The CSN complex is an essential regulator of the ubiquitin (Ubl) conjugation pathway by mediating the deneddylation of the cullin subunits of SCF-type E3 ligase complexes, leading to decrease the Ubl ligase activity of SCF-type complexes such as SCF, CSA or DDB2. The comp…
CYSRT1	ENSG00000197191	A8MQ03	375791	null
DGCR6L	ENSG00000128185	Q9BY27	85359	May play a role in neural crest cell migration into the third and fourth pharyngeal pouches.
EHMT2	ENSG00000204371	Q96KQ7	10919	Histone methyltransferase that specifically mono- and dimethylates 'Lys-9' of histone H3 (H3K9me1 and H3K9me2, respectively) in euchromatin. H3K9me represents a specific tag for epigenetic transcriptional repression by recruiting HP1 proteins to methylated histones. Also mediates monomethylation of 'Lys-56' of histone H3 (H3K56me1) in G1 phase, leading to promote interaction between histone H3 an…
EVI5	ENSG00000067208	O60447	7813	Functions as a regulator of cell cycle progression by stabilizing the FBXO5 protein and promoting cyclin-A accumulation during interphase. May play a role in cytokinesis.
FRMD8	ENSG00000126391	Q9BZ67	83786	null
FRS3	ENSG00000137218	O43559	10817	Adapter protein that links FGF and NGF receptors to downstream signaling pathways. Involved in the activation of MAP kinases. Down-regulates ERK2 signaling by interfering with the phosphorylation and nuclear translocation of ERK2.
GOLGA6L9	ENSG00000197978	A6NEM1	440295	null
INCA1	ENSG00000196388	Q0VD86	388324	null
KIFC3	ENSG00000140859	Q9BVG8	3801	Minus-end microtubule-dependent motor protein. Involved in apically targeted transport (By similarity). Required for zonula adherens maintenance.
KRT31	ENSG00000094796	Q15323	3881	null
KRT34	ENSG00000131737	O76011	100653049	null
KRT35	ENSG00000197079	Q92764	3886	null
KRT40	ENSG00000204889	Q6A162	125115	May play a role in late hair differentiation.
KRTAP1-1	ENSG00000188581	Q07627	81851	In the hair cortex, hair keratin intermediate filaments are embedded in an interfilamentous matrix, consisting of hair keratin-associated proteins (KRTAP), which are essential for the formation of a rigid and resistant hair shaft through their extensive disulfide bond cross-linking with abundant cysteine residues of hair keratins. The matrix proteins include the high-sulfur and high-glycine-tyros…
KRTAP1-3	ENSG00000221880	Q8IUG1	81850	In the hair cortex, hair keratin intermediate filaments are embedded in an interfilamentous matrix, consisting of hair keratin-associated proteins (KRTAP), which are essential for the formation of a rigid and resistant hair shaft through their extensive disulfide bond cross-linking with abundant cysteine residues of hair keratins. The matrix proteins include the high-sulfur and high-glycine-tyros…
KRTAP3-1	ENSG00000212901	Q9BYR8	83896	In the hair cortex, hair keratin intermediate filaments are embedded in an interfilamentous matrix, consisting of hair keratin-associated proteins (KRTAP), which are essential for the formation of a rigid and resistant hair shaft through their extensive disulfide bond cross-linking with abundant cysteine residues of hair keratins. The matrix proteins include the high-sulfur and high-glycine-tyros…
LNX1	ENSG00000072201	Q8TBB1	84708	E3 ubiquitin-protein ligase that mediates ubiquitination and subsequent proteasomal degradation of NUMB. E3 ubiquitin ligases accept ubiquitin from an E2 ubiquitin-conjugating enzyme in the form of a thioester and then directly transfers the ubiquitin to targeted substrates. Mediates ubiquitination of isoform p66 and isoform p72 of NUMB, but not that of isoform p71 or isoform p65.
LZTS2	ENSG00000107816	Q9BRK4	84445	Negative regulator of katanin-mediated microtubule severing and release from the centrosome. Required for central spindle formation and the completion of cytokinesis. May negatively regulate axonal outgrowth by preventing the formation of microtubule bundles that are necessary for transport within the elongating axon. Negative regulator of the Wnt signaling pathway. Represses beta-catenin-mediate…
MAGOHB	ENSG00000111196	Q96A72	55110	Involved in mRNA splicing and in the nonsense-mediated decay (NMD) pathway.
MDFI	ENSG00000112559	Q99750	4188	Inhibits the transactivation activity of the Myod family of myogenic factors and represses myogenesis. Acts by associating with Myod family members and retaining them in the cytoplasm by masking their nuclear localization signals. Can also interfere with the DNA-binding activity of Myod family members. Plays an important role in trophoblast and chondrogenic differentiation. Regulates the transcri…
NBPF19	ENSG00000271383	A0A087WUL8	101060226	null
NOTCH2NL	ENSG00000264343	Q7Z3S9	100996717	Human-specific protein that promotes neural progenitor proliferation and evolutionary expansion of the brain neocortex by regulating the Notch signaling pathway (PubMed:29856954, PubMed:29856955, PubMed:29561261). Able to promote neural progenitor self-renewal, possibly by down-regulating neuronal differentiation genes, thereby delaying the differentiation of neuronal progenitors and leading to a…
PGBD1	ENSG00000137338	Q96JS3	84547	null
PIN1	ENSG00000127445	Q13526	5300	Peptidyl-prolyl cis/trans isomerase (PPIase) that binds to and isomerizes specific phosphorylated Ser/Thr-Pro (pSer/Thr-Pro) motifs. By inducing conformational changes in a subset of phosphorylated proteins, acts as a molecular switch in multiple cellular processes (PubMed:21497122, PubMed:22033920, Ref. 21). Displays a preference for acidic residues located N-terminally to the proline bond to be…
REL	ENSG00000162924	Q04864	5966	Proto-oncogene that may play a role in differentiation and lymphopoiesis. NF-kappa-B is a pleiotropic transcription factor which is present in almost all cell types and is involved in many biological processed such as inflammation, immunity, differentiation, cell growth, tumorigenesis and apoptosis. NF-kappa-B is a homo- or heterodimeric complex formed by the Rel-like domain-containing proteins R…
SCAND1	ENSG00000171222	P57086	51282	May regulate transcriptional activity.
SIVA1	ENSG00000184990	O15304	10572	Induces CD27-mediated apoptosis. Inhibits BCL2L1 isoform Bcl-x(L) anti-apoptotic activity. Inhibits activation of NF-kappa-B and promotes T-cell receptor-mediated apoptosis.
SUFU	ENSG00000107882	Q9UMX1	51684	Negative regulator in the hedgehog/smoothened signaling pathway. Down-regulates GLI1-mediated transactivation of target genes (PubMed:15367681, PubMed:24311597, PubMed:24217340). Down-regulates GLI2-mediated transactivation of target genes (PubMed:24311597, PubMed:24217340). Part of a corepressor complex that acts on DNA-bound GLI1. May also act by linking GLI1 to BTRC and thereby targeting GLI1 …
TAX1BP1	ENSG00000106052	Q86VP1	8887	Inhibits TNF-induced apoptosis by mediating the TNFAIP3 anti-apoptotic activity. Degraded by caspase-3-like family proteins upon TNF-induced apoptosis. May also play a role in the pro-inflammatory cytokine IL-1 signaling cascade.
TRIM27	ENSG00000204713	P14373	5987	E3 ubiquitin-protein ligase that mediates ubiquitination of PIK3C2B and inhibits its activity; mediates the formation of 'Lys-48'-linked polyubiquitin chains; the function inhibits CD4 T-cell activation. Acts as a regulator of retrograde transport: together with MAGEL2, mediates the formation of 'Lys-63'-linked polyubiquitin chains at 'Lys-220' of WASHC1, leading to promote endosomal F-actin asse…
UBE2I	ENSG00000103275	P63279	7329	Accepts the ubiquitin-like proteins SUMO1, SUMO2, SUMO3 and SUMO4 from the UBLE1A-UBLE1B E1 complex and catalyzes their covalent attachment to other proteins with the help of an E3 ligase such as RANBP2, CBX4 and ZNF451. Can catalyze the formation of poly-SUMO chains. Necessary for sumoylation of FOXL2 and KAT5. Essential for nuclear architecture and chromosome segregation. Sumoylates p53/TP53 at…
ZKSCAN4	ENSG00000187626	Q969J2	387032	May be involved in the transcriptional activation of MDM2 and EP300 genes.
ZKSCAN7	ENSG00000196345	Q9P0L1	55888	May be involved in transcriptional regulation.
ZNF165	ENSG00000197279	P49910	7718	May be involved in transcriptional regulation.
ZNF18	ENSG00000154957	P17022	7566	May be involved in transcriptional regulation.
ZNF232	ENSG00000167840	Q9UNY5	7775	May be involved in transcriptional regulation.
ZNF24	ENSG00000172466	P17028	7572	Transcription factor required for myelination of differentiated oligodendrocytes. Required for the conversion of oligodendrocytes from the premyelinating to the myelinating state. In the developing central nervous system (CNS), involved in the maintenance in the progenitor stage by promoting the cell cycle. Specifically binds to the 5'-TCAT-3' DNA sequence (By similarity). Has transcription repre…
ZNF263	ENSG00000006194	O14978	10127	Might play an important role in basic cellular processes as a transcriptional repressor.
ZNF396	ENSG00000186496	Q96N95	252884	Isoform 1 and isoform 2 act as DNA-dependent transcriptional repressors.
ZNF397	ENSG00000186812	Q8NF99	84307	Isoform 3 acts as a DNA-dependent transcriptional repressor.
ZNF483	ENSG00000173258	Q8TF39	158399	May be involved in transcriptional regulation.
ZNF496	ENSG00000162714	Q96IT1	84838	DNA-binding transcription factor that can both act as an activator and a repressor.
ZSCAN12	ENSG00000158691	O43309	9753	May be involved in transcriptional regulation.
ZSCAN16	ENSG00000196812	Q9H4T2	80345	May be involved in transcriptional regulation.
ZSCAN18	ENSG00000121413	Q8TBC5	65982	May be involved in transcriptional regulation.
ZSCAN21	ENSG00000166529	Q9Y5A6	7589	Strong transcriptional activator.
ZSCAN22	ENSG00000182318	P10073	342945	May be involved in transcriptional regulation.
ZSCAN23	ENSG00000187987	Q3MJ62	222696	May be involved in transcriptional regulation.
ZSCAN29	ENSG00000140265	Q8IWY8	146050	May be involved in transcriptional regulation.
ZSCAN30	ENSG00000186814	Q86W11	100101467	May be involved in transcriptional regulation.
ZSCAN32	ENSG00000140987	Q9NX65	54925	May be involved in transcriptional regulation.
ZSCAN9	ENSG00000137185	O15535	7746	May be involved in transcriptional regulation.
##
## Date Downloaded: Jun 13 2019
## Database Version: 3
##
## Query Parameters
## Score Filter: 0
## Interaction Catagories Included: Published
## Tissue Filter: None
