# Supplementary material for: The testis protein ZNF165 is a SMAD3 cofactor that coordinates oncogenic TGFβ signaling in triple-negative breast cancer
Source: eLife. 2020 Jun 9;9:e57679. doi: 10.7554/eLife.57679 (PMC7302877; doi:10.7554/eLife.57679)
Supplement: Supplementary file 4. [file elife-57679-supp4.xls]

## Sheet: Taqman probes
Gene	Catalog number	Source
APCDD1L	Hs00542128_m1	Thermo Fisher Scientific
CDKN1B	Hs00153277_m1	Thermo Fisher Scientific
CXCL12	Hs03676656_mH	Thermo Fisher Scientific
CYP1B1	Hs00164383_m1	Thermo Fisher Scientific
DLX2	Hs00269993_m1	Thermo Fisher Scientific
DUSP4	Hs01027785_m1	Thermo Fisher Scientific
EPHB2	Hs00362096_m1	Thermo Fisher Scientific
FOXQ1	Hs00536425_s1	Thermo Fisher Scientific
GEM	Hs00738924_m1	Thermo Fisher Scientific
HAS2	Hs00193435_m1	Thermo Fisher Scientific
PER1	Hs00242988_m1	Thermo Fisher Scientific
RDH10	Hs00416907_m1	Thermo Fisher Scientific
RRAD	Hs00188163_m1	Thermo Fisher Scientific
SMOX	Hs00602494_m1	Thermo Fisher Scientific
SMURF2	Hs00909288_m1	Thermo Fisher Scientific
TFAP2C	Hs00231476_m1	Thermo Fisher Scientific
TOB1	Hs03986111_s1	Thermo Fisher Scientific
ZMIZ1	Hs00393480_m1	Thermo Fisher Scientific

## Sheet: siRNAs
Description	Catalog number	Source
siRNA targeting ZNF165	siGENOME MQ-011801-01-0002	Dharmacon
siRNA targeting SMAD3	siGENOME MQ-020067-00-0002	Dharmacon
siRNA targeting ZNF446	siGENOME MQ-020365-01-0002	Dharmacon
siRNA targeting TRIM27	siGENOME MQ-006552-01-0002	Dharmacon
siRNA targeting SCAND1	siGENOME MQ-013192-00-0002	Dharmacon
siRNA targeting ZNF24	siGENOME MQ-019702-01-0002	Dharmacon
siRNA targeting ZNF263	siGENOME MQ-018336-00-0002	Dharmacon
siRNA targeting ZKSCAN8	siGENOME MQ-020154-01-0002	Dharmacon
non-targeting siRNA pool #2	siGENOME D-001206-14-50	Dharmacon
siRNA targeting RRAD	SASI_Hs01_00221658	Sigma-Aldrich
siRNA targeting RRAD	SASI_Hs01_00221655	Sigma-Aldrich
siRNA targeting RRAD	SASI_Hs01_00221652	Sigma-Aldrich
siRNA targeting RRAD	SASI_Hs01_00221653	Sigma-Aldrich

## Sheet: shRNAs
Description	Catalog number	Sequence	Source
shRNA targeting TRIM27 in pLKO.1 backbone	SHCLNG-NM_006510 TRCN0000280319	CCGGGAATTAAGAGAGGCTCAGTTACTCGAGTAACTGAGCCTCTCTTAATTCTTTTTG	Sigma-Aldrich
shRNA targeting TRIM27 in pLKO.1 backbone	SHCLNG-NM_006510 TRCN0000011021	CCGGGCCCTACTTCAGTCTGAGTTACTCGAGTAACTCAGACTGAAGTAGGGCTTTTT	Sigma-Aldrich
non-targeting shRNA in pLKO.1 backbone	SHC002		Sigma-Aldrich

## Sheet: ChIP-qPCR primers
Description	Forward primer (5'-3')	Reverse primer (5'-3')
ZNF165-SMAD3 binding site proximal to SMURF2	CAGGAGCCAGAGTGAAGGCG	GGGTCATCCTCGTTTGGCTTC
ZNF165-SMAD3 binding site proximal to RRAD	CAGTGGGAAGAGGAAGTTATG	GTGTGTGGTGGCTCTTTAG
SMAD3-only binding site proximal to LBH	ATCCCACAGCAGTGAATG	GTCATCTTGGCCGATCTC
Negative control region for H3K27ac changes	CAATCTTCCACAGCACAAGG	TCCCTTGCCAAGCAGTTA
